# Supplementary material
Source: publisher site journal article supplement (https://www.dovepress.com/article/364945)
Supplement: Supplementary file 1 [file get_supplementary_file.php]

**Dual Effect of the Extract from the Fungus Coriolus Versicolor on Lipopolysaccharide-Induced Cytokine Production in RAW 264.7 Macrophages Depending on the Lipopolysaccharide Concentration (Manuscript ID number: 364945)**

Tomasz Jędrzejewski, Justyna Sobocińska, Małgorzata Pawlikowska, Artur Dzialuk, Sylwia Wrotek

**Supplementary materials**

**
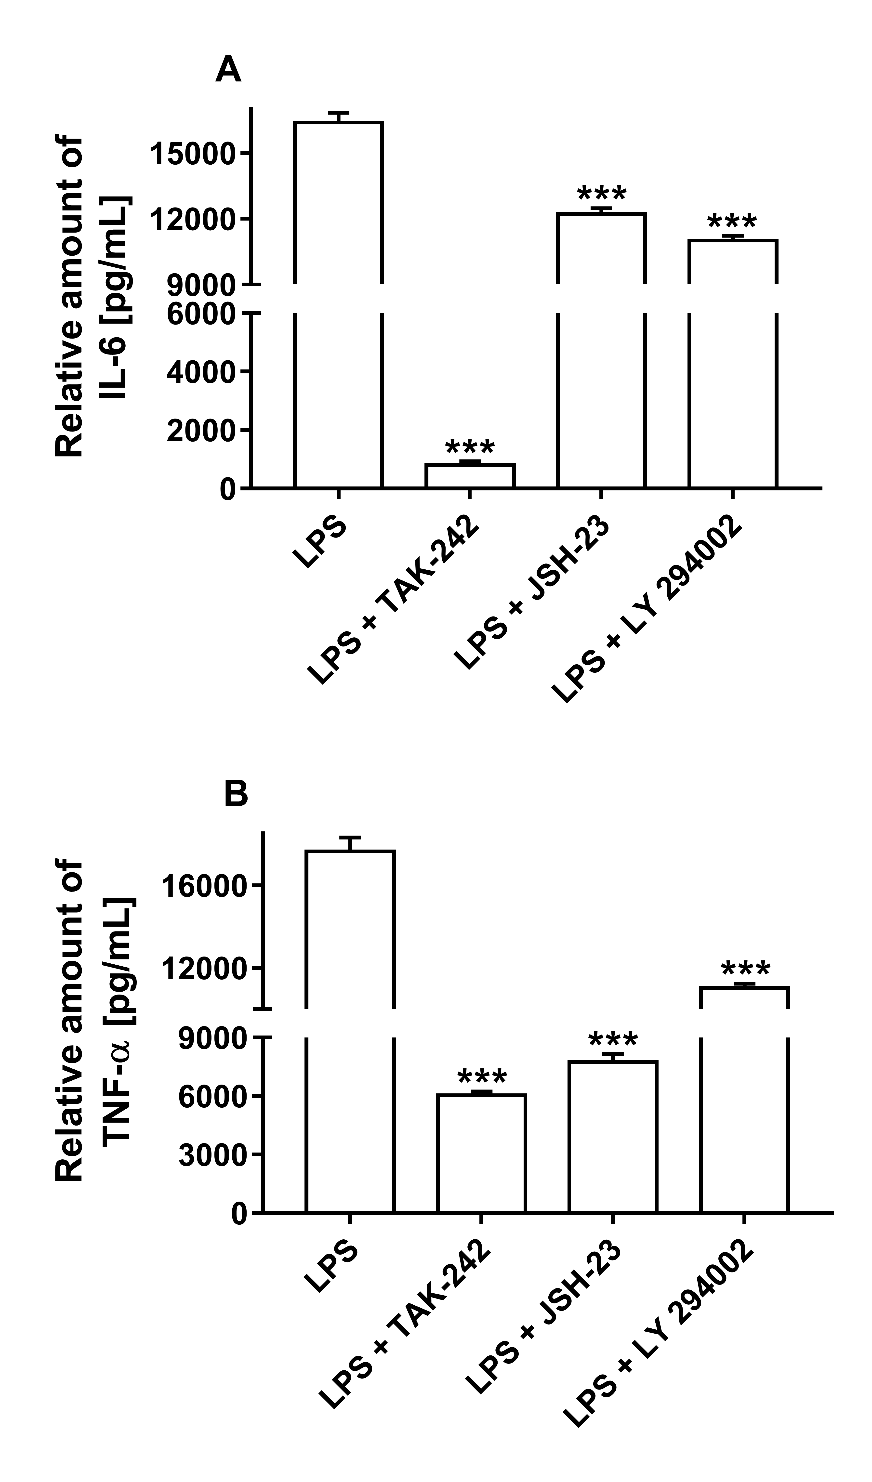
**

**Supplementary Figure 1**. Effects of the selective inhibitors on production of IL-6 (A) and TNF-α (B) in the LPS-stimulated RAW 264.7 cells. Cells were stimulated with LPS alone (100 ng/mL) or pre-treated with the following inhibitors: TAK-242 (0.1 µM), JSH-23 (10 µM) and LY294002 (2 µM) for 2 h followed by the stimulation with LPS for 24 h. Data are shown as the mean ± SEM of two independent experiments with five wells in each experiment. Asterisks indicate significant differences between the cells stimulated with LPS alone and the cells co-treated with LPS and the inhibitors (*** p < 0.001).
